# Supplementary material
Source: Research Square preprint supplement (doi:10.21203/rs.3.rs-9182061/v1)
Supplement: Supplementary file 1 [file 35832a99a676d05d32abb943.docx]

**Table S1**: Table of Abbreviations

| Abbreviation | Full Term |
| --- | --- |
| AFM | Atomic Force Microscopy |
| AC | Alternating Current |
| Au | Gold |
| Br | Bromine |
| CPE | Constant Phase Element |
| CNTs | Carbon Nanotubes |
| DI | Deionized Water |
| EEC | Equivalent Electrical Circuit |
| EDX | Energy-Dispersive X-ray Spectroscopy |
| Eg | Optical Band Gap |
| EIS | Electrochemical Impedance Spectroscopy |
| FESEM | Field-Emission Scanning Electron Microscopy |
| FG | Fluorinated Graphene |
| FTIR | Fourier-Transform Infrared Spectroscopy |
| GO | Graphene Oxide |
| G-TBAB | Tetrabutylammonium Bromide–Functionalized Graphene |
| HF | Hydrofluoric Acid |
| HR-TEM | High-Resolution Transmission Electron Microscopy |
| ITO | Indium Tin Oxide |
| LED | Light-Emitting Diode |
| Li | Lithium |
| LiF | Lithium Fluoride |
| Li-MWCNTs | Lithium-Functionalized Multi-Walled Carbon Nanotubes |
| MWCNTs | Multi-Walled Carbon Nanotubes |
| PL | Photoluminescence |
| QAS | Quaternary Ammonium Salts |
| Qc | Interfacial Capacitance |
| Rf | Film Resistance |
| RSS | Series Sheet Resistance |
| Rct | Charge Transfer Resistance |
| SEM | Scanning Electron Microscopy |
| sp² / sp³ | sp² / sp³ Hybridized Carbon |
| TBAB | Tetrabutylammonium Bromide |
| TEM | Transmission Electron Microscopy |
| UV–Vis | Ultraviolet–Visible Spectroscopy |
| W | Warburg Impedance |
| XPS | X-ray Photoelectron Spectroscopy |
| XRD | X-ray Diffraction |
